# Supplementary material for: Controllable synthesis of Ni(OH)2/Co(OH)2 hollow nanohexagons wrapped in reduced graphene oxide for supercapacitors
Source: Royal Society of Chemistry journal article supplement (doi:10.1039/c6ra20361b), 2016-01-01
Supplement: c6ra20361b1.pdf [file c6ra20361b1.pdf]

### ***Supporting information***

## Controllable synthesis of Ni(OH)<sub>2</sub>/Co(OH)<sub>2</sub> hollow nanohexagons wrapped by reduced graphene oxide for supercapacitors

*Xinruo Su,<sup>1</sup> Changzhong Gao,<sup>1</sup> Ming Cheng,<sup>1</sup> Rongming Wang<sup>2,\*</sup>*

<sup>1</sup> Department of Physics, Beihang University, Beijing 100191, P. R. China.

<sup>2</sup> School of Mathematics & Physics, University of Science and Technology Beijing,

Beijing 100083, P. R. China

Table S1. Specific capacitance, equivalent series resistance and charge transfer resistance of hollow nanohexagons with different rGO concentrations.

| <i>Concentration of rGO<br/>(<math>\mu\text{g/mL}</math>)</i> | <i>Specific capacitance<br/>(F/g)</i> | <i>Equivalent<br/>series resistance<br/>(<math>\Omega</math>)</i> | <i>Charge transfer<br/>resistance<br/>(<math>\Omega</math>)</i> |
|---------------------------------------------------------------|---------------------------------------|-------------------------------------------------------------------|-----------------------------------------------------------------|
| <i>0</i>                                                      | 358.7                                 | 1.519                                                             | 0.210                                                           |
| <i>0.6</i>                                                    | 504.9                                 | 0.553                                                             | 0.142                                                           |
| <i>1.0</i>                                                    | 1292.8                                | 0.338                                                             | 0.086                                                           |
| <i>1.4</i>                                                    | 526.7                                 | 0.375                                                             | 0.268                                                           |
| <i>2.0</i>                                                    | 432.2                                 | 0.394                                                             | 0.279                                                           |

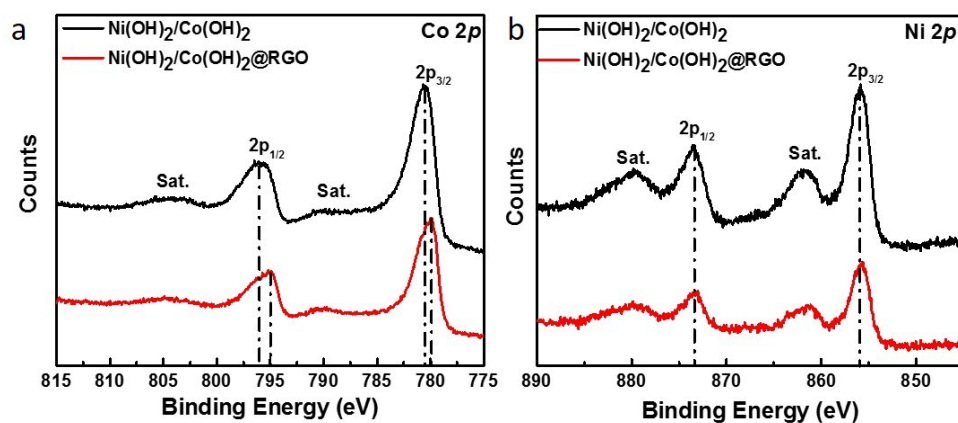

Figure S1. XPS spectrum of the Ni(OH)<sub>2</sub>/Co(OH)<sub>2</sub> hollow nanohexagons with and without rGO, respectively.

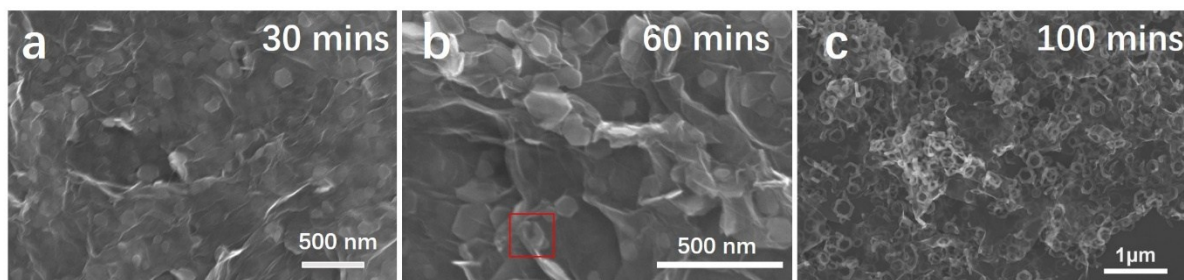

Figure S2. Time-dependent SEM images of the formation process of hollow nanohexagons wrapped by rGO.

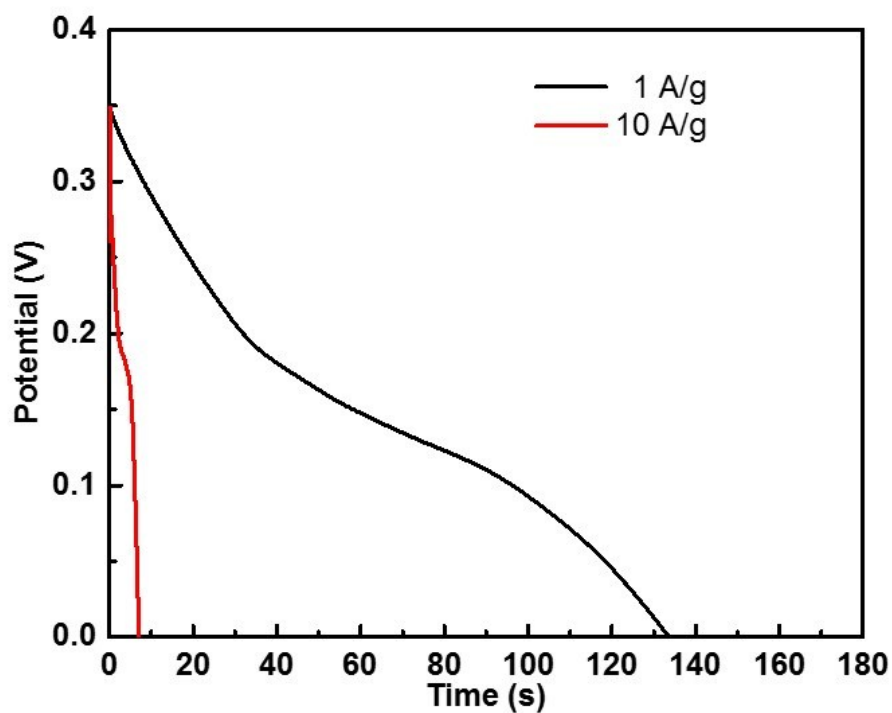

Figure S3. Galvanostatic discharge curves of hollow nanohexagons electrodes without rGO at a current density of 1 and 10 A/g, respectively;

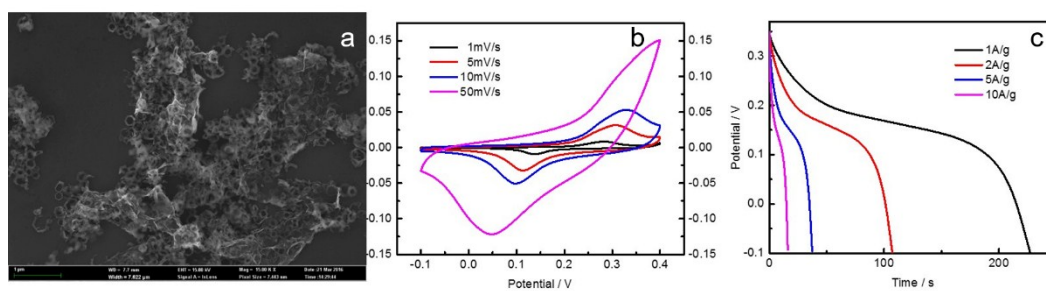

Figure S4. Morphology images of Ni(OH)<sub>2</sub>/Co(OH)<sub>2</sub> hollow nanohexagons with 0.6 μg/mL rGO and its (b) CV curves in different scan rates and (c) CP curves in different current densities.

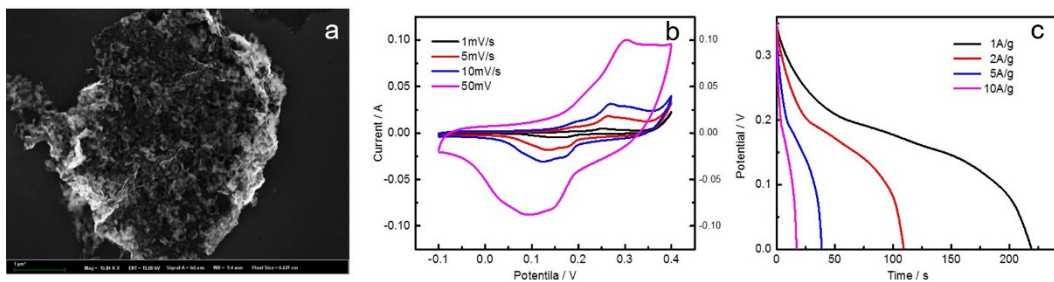

Figure S5. Morphology images of Ni(OH)<sub>2</sub>/Co(OH)<sub>2</sub> hollow nanohexagons with 1.4 μg/mL rGO and its (b) CV curves in different scan rates and (c) CP curves in different current densities.

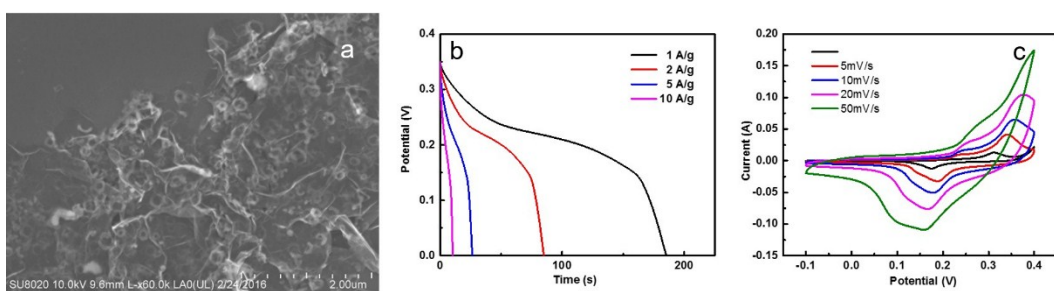

Figure S6. Morphology images of Ni(OH)<sub>2</sub>/Co(OH)<sub>2</sub> hollow nanohexagons with 2.0 μg/mL rGO and its (b) CV curves in different scan rates and (c) CP curves in different current densities.
